# Supplementary material for: Sub-nanograin metal based high efficiency multilayer reflective optics for high energies
Source: Royal Society of Chemistry journal article supplement (doi:10.1039/d1ra04412e), 2021-01-01
Supplement: d1ra04412e1.pdf [file d1ra04412e1.pdf]

## Supplementary Information for

# Sub-nanograins metal based high efficiency multilayer reflective optics for high energies

Arindam Majhi<sup>1,2</sup>, Maheswar Nayak<sup>1,2\*</sup>, Paresh Chandra Pradhan<sup>3</sup>, Suwendu Jena<sup>4</sup>, Anil Gome<sup>5</sup>, Manvendra Narayan Singh<sup>1</sup>, Himanshu Srivastava<sup>1</sup>, Varimalla Raghvendra Reddy<sup>5</sup>, Arvind Kumar Srivastava<sup>1,2</sup>, Anil Kumar Sinha<sup>1,2</sup>, Dinesh Venkatesh Udupa<sup>2,4</sup> and Ullrich Pietsch<sup>6</sup>

<sup>1</sup>Synchrotrons Utilization Section, Raja Ramanna Centre for Advanced Technology, Indore 452013, India

<sup>2</sup>Homi Bhabha National Institute, Anushakti Nagar, Mumbai 400094, India

<sup>3</sup> Advanced Photon Source, Argonne National Laboratory, Argonne, IL 60439, USA

<sup>4</sup>Atomic and Molecular Physics Division, Bhabha Atomic Research Centre, Mumbai 400085, India

<sup>5</sup>UGC-DAE Consortium for Scientific Research, University Campus, Khandwa Road, Indore 452001, India

<sup>6</sup>Universität Siegen, Walter-Flex-Strasse 3, Siegen, 57072, Germany

\*Corresponding author: [mnayak@rrcat.gov.in](mailto:mnayak@rrcat.gov.in)

### **SII: Theoretical calculations to understand material systems for soft gamma-ray ML reflective optics**

In the soft gamma-ray spectrometer, the main challenge is requirement for efficient optics to deliver sufficient amount of photon flux to improve signal-to-noise ratio. This is because of the weak signal strength of emitted gamma-rays from distance stellar objects as well as remnant radioactive isotopes in nuclear spent-fuel. This stipulates the need for a better material system for ML mirror that can provide both high peak reflectance as well as high integrated reflectance (area under the Bragg peak). For optical consideration, only four

32 selected material systems are chosen for optical consideration (Fig. S1), owing to their ability  
33 to form a low interfacial imperfection at ultra-short period, which is required for such a high  
34 energy application. According to classical wave physics, incoherent scattering in the soft  
35 gamma-ray region does not affect the intensities of ML optics at Bragg angle<sup>1</sup>, so the  
36 amplitude of the Bragg peak can be calculated theoretically using the wave model<sup>2</sup>. Fig. S1  
37 (a) demonstrates the tolerable range of interface width ( $\sigma$ ) in different MLs with period  $d =$   
38 1.86 nm calculated at 300 keV. The achievable  $\sigma$  reported earlier on WC/SiC ML optics<sup>1</sup> is  
39 0.275 nm (vertical dotted line), whereas that in the present study on W/B<sub>4</sub>C ML system is  
40 0.27 nm (vertical dashed line). At the marked values of  $\sigma$ , the calculated reflectivities of  
41 WC/SiC, WC/B<sub>4</sub>C, W/B<sub>4</sub>C and W/Si MLs are nearly the same within 1%. However, in order  
42 to understand the role of optical contrast on photon flux, Fig. S1 (b) shows that the onset of  
43 saturated peak reflectivity (marked by arrows) is material dependent. For a better  
44 understanding of Fig. S1 (b), it is noted that the ideal density contrast of WC/SiC, WC/B<sub>4</sub>C,  
45 W/B<sub>4</sub>C and W/Si has to be 12.42 g cm<sup>-3</sup>, 13.11 g cm<sup>-3</sup>, 16.78 g cm<sup>-3</sup> and 16.97 g cm<sup>-3</sup>,  
46 respectively<sup>3</sup>. Thus, ideal density contrast in W/B<sub>4</sub>C is ~35 % higher compared to WC/SiC  
47 system. It is inferred from Fig. S1 (b) that the higher the density contrast, the lower is the  
48 number of layer pairs,  $N$ , reaching the onset of saturated reflectivity. The latter occurs at  $N$   
49 ~190 and ~250 for W/B<sub>4</sub>C and WC/SiC, respectively. Thus, W/B<sub>4</sub>C has higher integrated  
50 reflectance and provides a higher photon flux compared to both WC/SiC and WC/B<sub>4</sub>C.  
51 Further, comparing W/B<sub>4</sub>C with W/Si, the achievable interfacial perfection in W/B<sub>4</sub>C is  
52 anticipated better because of interfacial diffusion and/or reactivity of Si with metal<sup>4-6</sup>. Also,  
53 the integrated 1<sup>st</sup> Bragg peak intensities (FWHM  $\times$  peak reflectivity) is calculated with two  
54 ML systems (WC/SiC and W/B<sub>4</sub>C) calculated by considering the periodicity 1.86 nm,  
55  $N=400$ , ideal mass densities and zero roughnesses of materials at a photon energy of 378

56 keV. Calculations are done by considering the step size of  $0.0001^\circ$ . The calculated integrated  
 57 1<sup>st</sup> Bragg peak intensity of W/B<sub>4</sub>C ML is  $\sim 40\%$  greater compared to the WC/SiC ML.

58

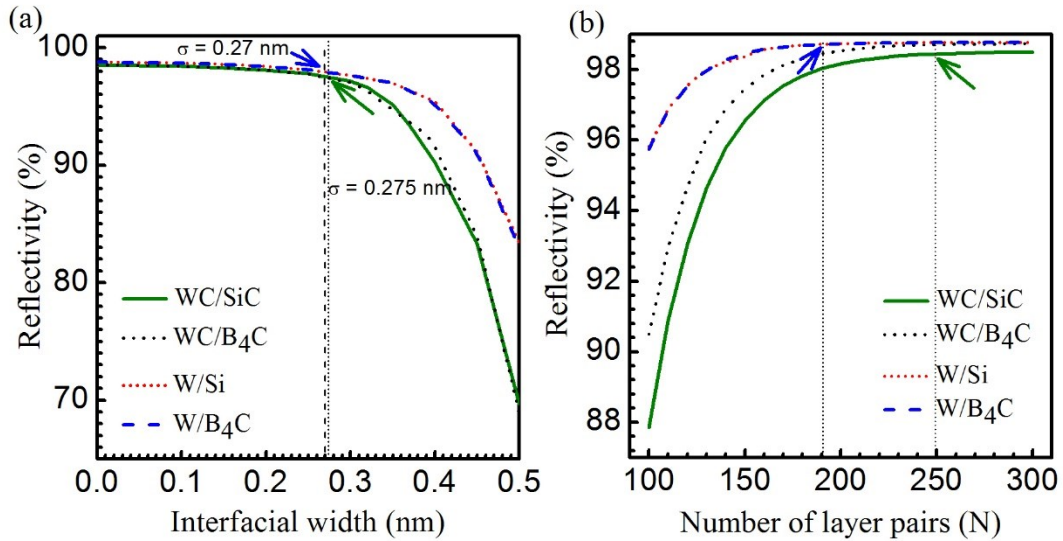

59

60 **Fig. S1** Optical performance of MLs with four different material systems (WC/SiC, WC/B<sub>4</sub>C,  
 61 W/Si and W/B<sub>4</sub>C) calculated by considering ideal mass densities of materials at a photon  
 62 energy of 300 keV. Calculations are done by considering the step size of  $0.0001^\circ$  and  
 63 instrumental angular resolution ( $\Delta\theta$ ) of  $0.0001^\circ$ . (a) Peak reflectivity of the first order Bragg  
 64 peak as a function of  $\sigma$ . The calculations are performed for MLs with  $N = 400$ ,  $d = 1.86$  nm  
 65 and the thickness ratio,  $\Gamma = 0.505$ . The vertical dotted line indicates the value of  $\sigma = 0.275$   
 66 nm of previously reported WC/SiC ML optics<sup>1</sup> and the vertical dashed line represents the  
 67 interfacial width 0.27 nm of W/B<sub>4</sub>C ML in the present study. The positions of the olive and  
 68 blue colored arrows indicate the corresponding calculated reflectivities at the marked value of  
 69  $\sigma$ . (b) Peak reflectivity of the first order Bragg peak as a function of  $N$  indicating material  
 70 dependence of onset of saturated peak reflectivity (marked by arrows).

71

## 72 **SI2: Crystallite size considering W (211) orientation**

73 Figure S2 shows the measured GIXRD spectra considering W (211) orientation as well as W (220)  
 74 orientation for ML-2 at 15.6 keV with incident angle at  $4.5^\circ$ . Since, the intensities are smaller, so we  
 75 measured only in out-of-plane direction. Since, the intensities of W (220) is very weak, so it is  
 76 difficult to extract the crystalline size accurately using W (220). Hence, here we call very weak W

77 (220) along with other possible peaks, which we unable to measure due to low intensities as random  
 78 orientation in the schematic (Figure 4 in the manuscript).

79

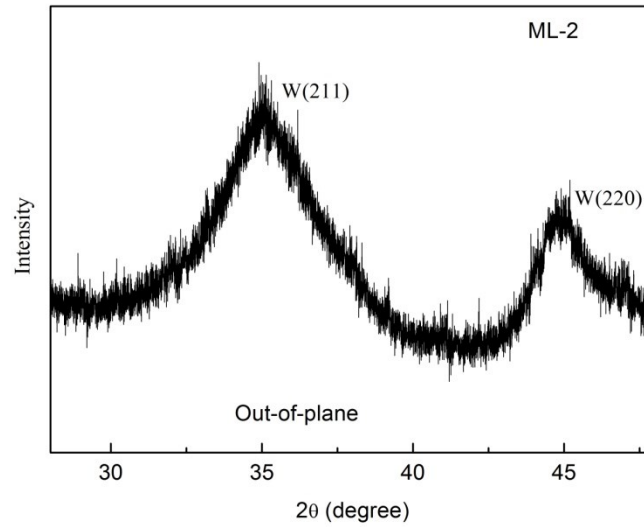

80

81 Fig. S2: GIXRD spectra for ML-2 at 15.6 keV with incident angle at 4.5°. It shows that the W (211)  
 82 orientation as well as W (220) orientation.

83 The measured data of W (211) having weak intensities for all three samples (ML-1, ML-2 and ML-3)  
 84 in the out-of-plane direction along with the fitted curves are as shown in figure below. The  
 85 approximate average crystallite sizes in out-of-plane direction obtained for W (211) is given in Table,  
 86 which is ~1 nm range.

87

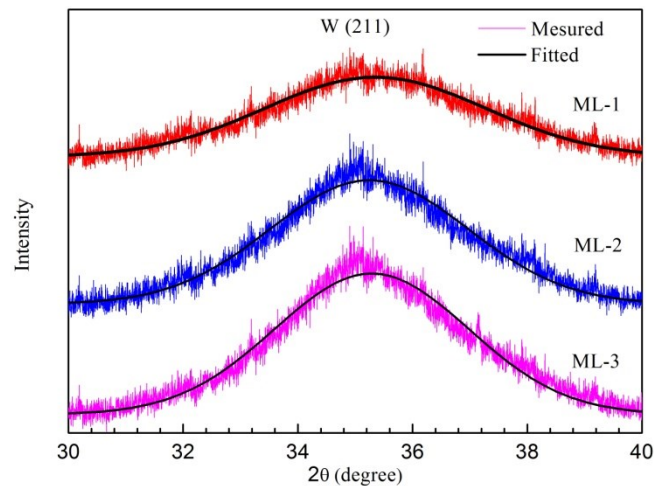

88

89 Fig. S3: Measured and fitted GIXRD profiles of W (211) diffraction of three MLs at energy  
 90 15.6 keV in out-of-plane direction.

91 Table: Out-of-plane crystallite size considering W (211)

| Sample Number | Peak position ( $2\theta$ ) of W | Crystallite size |
|---------------|----------------------------------|------------------|
|---------------|----------------------------------|------------------|

|      | (211) (degree) |         |
|------|----------------|---------|
| ML-1 | 35.34          | 0.94 nm |
| ML-2 | 35.24          | 1.05 nm |
| ML-3 | 35.28          | 1.07 nm |

92

93

94 **SI3: Analysis of Residual stress in ML stack**

95 The residual stress is another important factor that needs to be characterized in such ML  
 96 mirrors having large values of N for long term stability.

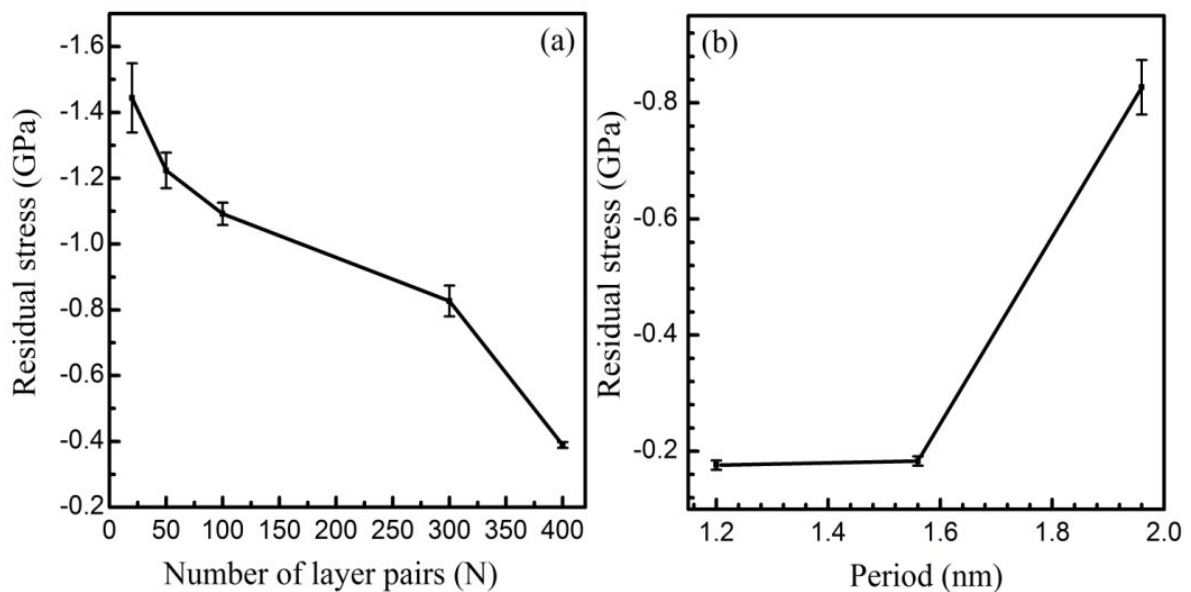

97

98

99 **Fig. S4** The measured total residual stress in W/B<sub>4</sub>C ML films as a function of N from 20 to  
 100 400 at a fixed period  $d \approx 1.9$  nm is shown in the figure (a). The details analysis of residual  
 101 stress as function of number of layer pairs are reported elsewhere<sup>7</sup>. Fig. S4 (a) is reproduced  
 102 from A. Majhi et al., J. Applied Physics, 2018, 124, 115306, with the permission of AIP  
 103 Publishing as the reference of our earlier work on total residual stress in ML optics. The total  
 104 residual stress is compressive in nature. Total residual stress decreases with increasing N. For  
 105  $N = 400$ , total residual stress of ML film is -0.389 GPa. It is also observed that at a fixed  
 106 number of layer pairs  $N=300$ , as the periodicity decreases, the residual stress decreases as  
 107 shown in figure (b). Previously Fernandez Perea et al.<sup>8</sup> measured the total residual stress  
 108 WC/SiC ML with varying periodicity, number of layer pairs and different  $\Gamma$  ratio. They  
 109 measured the total residual stress is compressive. The total compressive residual stress is  
 110  $\sim 0.55$  GPa for ML with  $N= 300$  ( $d = 1$  nm and  $\Gamma=0.4$ ) and the total compressive residual

111 stress is  $\sim 0.2$  GPa for  $N=500$  ( $d=1.5$  nm and  $\Gamma=0.4$ ). In the present study, for W/B<sub>4</sub>C ML  
 112 the total residual stress is  $-0.827 \pm 0.047$  GPa for  $N=300$  and  $-0.389 \pm 0.009$  GPa for  $N=$   
 113 400. The measured stress in W/B<sub>4</sub>C ML with  $N=400$  is in the tolerable range for soft gamma  
 114 ray multilayer optics.

115

116

#### 117 **SI4: Study of Period Uniformity**

118 In the soft gamma-ray region, ML mirrors to be operated at extremely small glancing  
 119 incidence angles of a few to several milli-radians, so it is important to characterize the lateral  
 120 uniformity of  $d$  of the ML mirrors.

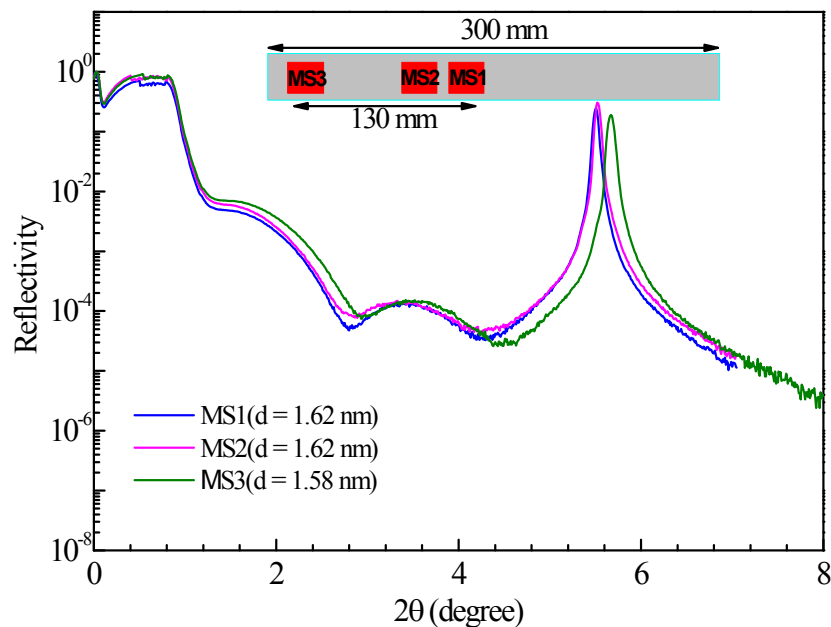

121

122 **Fig. S5** Measured XRR data ( at Cu  $K_{\alpha}$  energy)of three W/B<sub>4</sub>C ML samples (MS1, MS2,  
 123 MS3) with a fixed  $N=300$  fabricated in one run deposition. The three samples are mounted at  
 124 three different distances starting from middle position towards one end within 130 mm length  
 125 scale in a 300 mm Substrate holder as shown in inset of the figure. The periodicity decreases  
 126 slightly from centre of the substrate holder to the end of the one side in a regular manner with  
 127 respect to the distance from the centre of the substrate holder. This is due to the spatial  
 128 variations of deposition rate across the cathode (500 mm length) material. It is anticipated  
 129 that density of plasma is more at the centre of the cathode, and decreases towards the ends of  
 130 the cathode in a magnetron sputtering. The XRR data shows that the period non-uniformity  
 131 over 130 mm length (from centre to one end of substrate holder) is  $\sim 2.5\%$ . It is anticipated  
 132 that the spatial variation of the sputtered atoms is nearly symmetrical from centre towards

133 both ends of cathode. So, by properly arranging a masking arrangement in front of cathode  
 134 with slightly symmetrically tapering of mask towards centre would neutralize the difference  
 135 of spatial distribution of sputtered atoms coming from the centre and from the both ends of  
 136 cathode through the tapered mask. This will certainly significantly further improve lateral  
 137 uniformity of period without altering the quality of ML optics in terms of layer structure,  
 138 interface width and residual stress in the ML stack.

### 139 SI5: Measured Optical performances and analysis

140

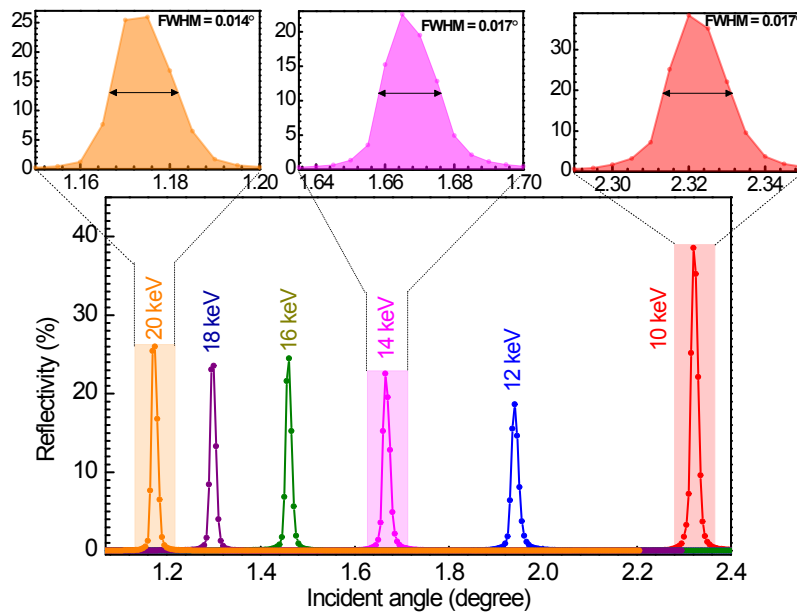

141

142 **Fig. S6** Measured optical performances of W/B<sub>4</sub>C ML (ML-2) with  $d = 1.55$  nm and  $N = 400$   
 143 in the energy range 10-20 keV. The percent of reflectivities (in linear scale) at first Bragg  
 144 peak as a function of the incident angle at different selected energies are shown in lower part  
 145 of the figure. At energy 10 keV the measured 1<sup>st</sup> Bragg peak reflectivity is  $\sim 39$  %. At 10  
 146 keV, by comparing with ML with  $d=1.86$  nm having reflectivity  $\sim 64$  % (ML-1, discussed in  
 147 manuscript), the decrease of reflectivity is due to  $q$ -dependency of reflectivity along with the  
 148 decrease of density contrast (13.1 g/cc) as well as slightly increase of interface width ( $\sim$   
 149 0.285 nm). The variations of measured reflectivity with the energies follows nearly a similar  
 150 trend for ML-1, ML-2 and ML-3 ( $d=1.23$  nm). When the energy increases to 12 keV  
 151 reflectivity decreases to  $\sim 18$  % which is due to the presence of W L<sub>II</sub>-edge at 11.544 keV.  
 152 After that the reflectivity again increases with increasing the incident photon energy away  
 153 from the W L<sub>II</sub>-edge at 11.544 keV. The top part shows the enlarged version of measured 1<sup>st</sup> order  
 154 Bragg peak indicating more clarity about FWHM at three different energies as 10 keV, 14  
 155 keV and 20 keV respectively.  $E/\Delta E$  is calculated using  $E/\Delta E = \tan(\theta_{\text{Bragg}}) \times (1/\text{FWHM of the}$

156 Bragg peak). The measured energy resolutions ( $\Delta E$ ) of Bragg are 75 eV, 143 eV and 243 eV  
 157 corresponding to the energies at 10 keV, 14 keV and 20 keV respectively. The variations of  
 158 the measured optical properties (first order reflectivity and resolution) agree well with the  
 159 theoretical values considering the respective derived model.

160

161

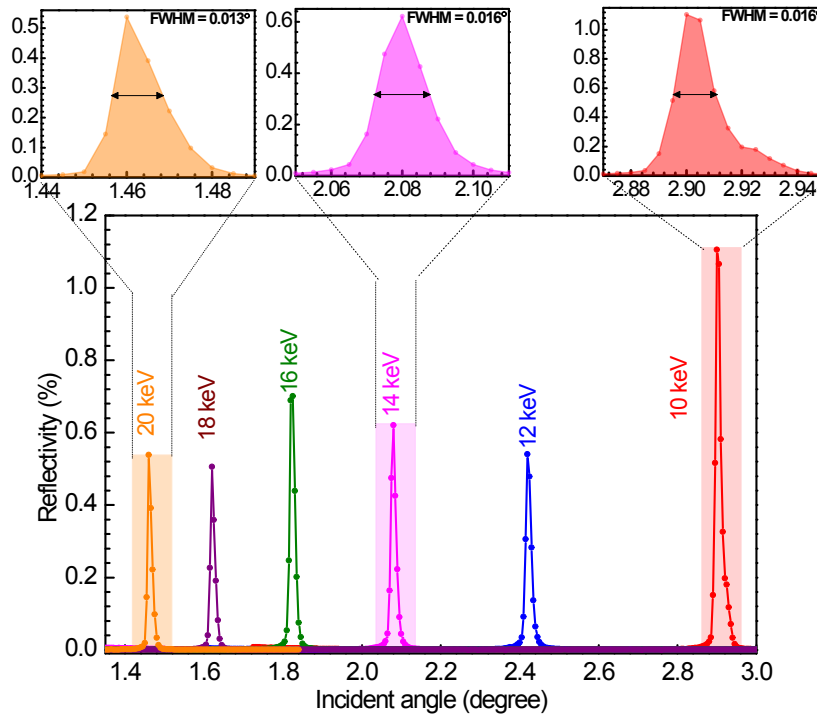

162

163 **Fig. S7** Measured optical performances of W/B<sub>4</sub>C ML (ML-3) with  $d = 1.23$  nm and  $N = 400$   
 164 in the energy range 10-20 keV. The percent of reflectivities (in linear scale) at first Bragg  
 165 peak as a function of the incident angle for selected energies are shown in lower part of the  
 166 figure. At energy 10 keV the measured 1<sup>st</sup> Bragg peak reflectivity is only  $\sim 1.1$  %. For  
 167 comparison with ML-1 and ML-2, the measured reflectivity drastically drops for ML-3 due to  
 168  $q$ -dependency of reflectivity along with significantly decreases of density contrast (6.5 g/cc)  
 169 at the interface along with increase of interfacial width (0.325 nm). The significantly decrease  
 170 of density contrast along with increase of interfacial width are due to formation of quasi-  
 171 continuous layer of B<sub>4</sub>C because of its low thickness (0.33 nm). When the energy increases  
 172 away from 10 keV the optical performance follow the same trend as other two ML mirrors.  
 173 The top figures show enlarge 1<sup>st</sup> order Bragg peak indicating more clarity about the measured  
 174 angular resolution of Bragg peaks at three selected energies. The variations of the measured  
 175 optical properties (reflectivity and resolution) agree well with the theoretical values  
 176 considering the respective derived model.



## 177 **SI6: Details of calculation of soft gamma-ray optical performance**

178 The predicted soft gamma-ray optical performances (1<sup>st</sup> order Bragg peak reflectivity) of  
 179 three ML mirrors (ML-1, ML-2 and ML-3) with varying instrumental angular resolution ( $\Delta\theta$ )  
 180 are calculated at photon energies of 384 keV ( $\Delta E = 3$  keV) and 378 keV ( $\Delta E = 9.8$  keV)  
 181 using ‘IMD’ code under ‘XOP’ software package<sup>2</sup>. The calculation is done with an angular  
 182 step size 0.1 mdeg using measured structural parameters of MLs derived from hard x-ray data  
 183 and by extrapolation of known optical properties of materials. The calculations of the  
 184 reflected intensities at the multiple discrete energies in the bandwidth interval with energy  
 185 step of 0.3 keV (0.5 keV) for  $\Delta E = 3$  keV (9.8 keV) are averaged to account the respective  
 186 resolution of incident photon energy. It is noted that Bragg reflection of such high energy  
 187 peak from ML mirror appears at very low Bragg angles. For example, a typical reflectance  
 188 band pass (FWHM) of the first order Bragg peak (position at ~50.4 mdeg) from ML with  $d$   
 189 = 1.86 nm and having  $\Delta\theta = 0.024$  mdeg is of the order of ~0.5 mdeg at energy 384 keV. So,  
 190 the  $\Delta\theta$  needs to be much lower than FWHM of the Bragg peak.

191

## 192 **References:**

- 193 1 M. Fernandez-Perea, M. A. Descalle, R. Soufli, K. P. Ziock, J. Alameda, S. L. Baker, T. J.  
 194 McCaville, V. Honkimaki, E. Ziegler, A. C. Jakobsen, F. E. Christensen, and M. J.  
 195 Pivovarovoff, *Phys. Rev. Lett.* 2013, **111**, 027404.
- 196 2 D. L. Windt, IMD version 5.0, 2013, See <http://www.rxolc.com/idl/index.html>.
- 197 3 B. L. Henke, E. M. Gullikson, J. C. Davis, *At. Data and Nucl. Data Tables* 1993, **54**, 181-  
 198 342, See [http://henke.lbl.gov/optical\\_constants/](http://henke.lbl.gov/optical_constants/).
- 199 4 C. Eberl, T. Liese, F. Schlenkrich, F Doring, H. Hofsass, H.-U. Krebs, *Appl. Phys. A*,  
 200 2013, **111**, 431-437.
- 201 5 Zhang Jin-Shuai; Huang Qiu-Shi; Jiang Li; Qi Run-Ze; Yang Yang; Wang Feng-Li;  
 202 Zhang Zhong; Wang Zhan-Shan. *Acta Physics Sinica*, 2016, **65**, 086101.
- 203 6 M. Jergel, E. Majkova, V. Holy, S. Luby, R. Senderak, *Il Nuovo Cimento*, 1997, **19**, 439-  
 204 445.
- 205 7 A. Majhi, M. Dilliwar, P. C. Pradhan, S. Jena, M. Nayak, M. N. Singh, D. V. Udupa, N. K.  
 206 Sahoo. *J. Appl. Phys.*, 2018, **124**, 115306.
- 207 8 M. Fernandez-Perea, M. J. Pivovarovoff, R. Soufli, J. Alameda, P. Mirkarimi, M. A. Descalle,  
 208 S. L. Baker, T. McCarville, K. Ziock, D. Hornback, S. Romaine, R. Bruni, Z. Zhong, V.

209 Honkimaki, E. Ziegler, F. E. Christensen, and A. C. Jakobsen, *Nucl. Instr. Meth. Phys. Res.*  
210 *A* 2013, **710**, 114-119.  
211  
212  
213
